# Supplementary material for: Skin-interfaced microfluidic biosensors for colorimetric measurements of the concentrations of ketones in sweat
Source: Royal Society of Chemistry journal article supplement (doi:10.1039/d4lc00588k), 2024-01-01
Supplement: d4lc00588k1.pdf [file d4lc00588k1.pdf]

## *Supporting Information for*

### **Skin-Interfaced Microfluidic Biosensors for Colorimetric Measurements of the Concentrations of Ketones in Sweat**

Yunyun Wu,<sup>ab</sup> Xinming Li,<sup>abc</sup> Kenneth E. Madsen,<sup>abd</sup> Haohui Zhang,<sup>c</sup> Soongwon Cho,<sup>ab</sup> Ruihao Song,<sup>ab</sup> Ravi F. Nuxoll,<sup>abfg</sup> Yirui Xiong,<sup>ab</sup> Jiaqi Liu,<sup>ab</sup> Jingyuan Feng,<sup>abf</sup> Tianyu Yang,<sup>ab</sup> Kaiqing Zhang,<sup>eh</sup> Alexander J. Aranyosi,<sup>abi</sup> Donald E. Wright,<sup>i</sup> Roozbeh Ghaffari,<sup>abci</sup> Yonggang Huang,<sup>aejf</sup> Ralph G. Nuzzo,<sup>\*d</sup> and John A. Rogers<sup>\*abcfk</sup>

\* Corresponding authors

<sup>a</sup> Querrey Simpson Institute for Bioelectronics, Northwestern University, Evanston, IL 60208, USA

**E-mail:** jrogers@northwestern.edu

<sup>b</sup> Center for Bio-Integrated Electronics, Northwestern University, Evanston, IL 60208, USA

<sup>c</sup> Department of Biomedical Engineering, Northwestern University, Evanston, IL 60208, USA

<sup>d</sup> Department of Chemistry, University of Illinois Urbana-Champaign, Urbana, IL 61801, USA

**E-mail:** r-nuzzo@illinois.edu

<sup>e</sup> Department of Civil and Environmental Engineering, Northwestern University, Evanston, IL 60208, USA

<sup>f</sup> Department of Materials Science and Engineering, Northwestern University, Evanston, IL 60208, USA

<sup>g</sup> Department of Physics and Astronomy, Northwestern University, Evanston, IL 60208, USA

<sup>h</sup> State Key Laboratory of Structural Analysis, Optimization and CAE Software for Industrial Equipment, Department of Engineering Mechanics, Dalian University of Technology, Dalian, 116024, Liaoning, China

<sup>i</sup> Epicore Biosystems, Inc., Cambridge, MA 02139 USA

<sup>j</sup> Department of Mechanical Engineering, Northwestern University, Evanston, IL 60208, USA

<sup>k</sup> Department of Neurological Surgery, Northwestern University, Evanston, IL 60208, USA

**List of ingredients of artificial eccrine sweat purchased from Pickering Laboratories:**

**Amino acids** (concentrations for listed amino acids range from 0.002 g/L (for Taurine) to 0.30 g/L (for Serine): Glycine, L-Alanine, L-Arginine, L-Asparagine, L-Aspartic acid, L-Citrulline, L-Glutamic acid, L-Histidine, L-Isoleucine, L-Leucine, L-Lysine as hydrochloride, L-Methionine, L-Ornithine as hydrochloride, L-Phenylalanine, L-Serine, L-Threonine, L-Tyrosine, L-Valine and Taurine.

**Metabolites** (concentrations for listed metabolites range from 0.015 g/L (for Uric Acid) to 1.74 g/L (for Urea): Uric Acid, Lactic Acid, Urea, and Ammonia

**Minerals:** Sodium (33 mM), Zinc (11.21  $\mu$ M), Chloride (80.34 mM), Calcium (5.49 mM), Iron (4.62  $\mu$ M), Magnesium (1.67 mM), Potassium (33 mM), Sulfate (2.57 mM)

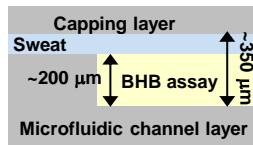

**Figure S1.** Schematic illustration of a BHB assay inside a microfluidic reservoir to show the position of the BHB assay relative to the flow of sweat.

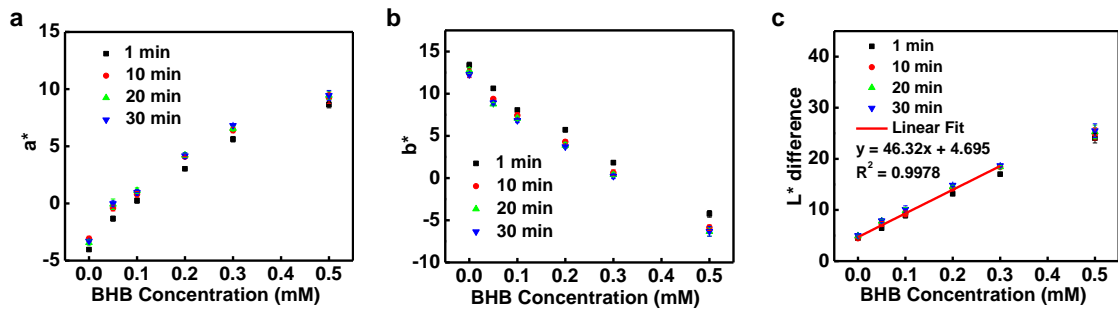

**Figure S2.** a) Redness  $a^*$  values extracted from images of BHB assays as a function of time after introduction of solutions of BHB at various concentrations. b) Yellowness  $b^*$  values extracted from the images of the BHB assay as a function of time after introduction of solutions of BHB at various concentrations. c) The lightness difference between the white background of the microfluidic device and the BHB assay as a function of time after introduction of solutions of BHB at various concentrations.

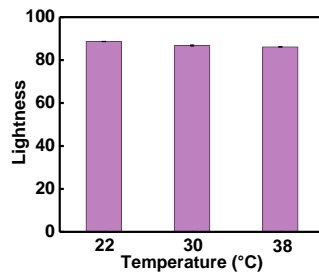

**Figure S3.** Lightness L\* values for various tested temperature.

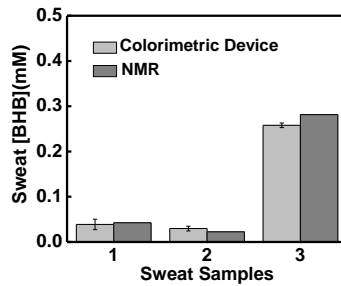

**Figure S4.** Measured [BHB] in sweat using NMR and the microfluidic devices.

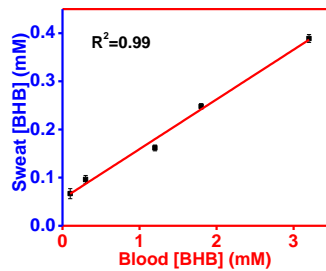

**Figure S5.** Plot of sweat [BHB] against blood [BHB] measured from subject 8 after taking various amounts of KE drink.

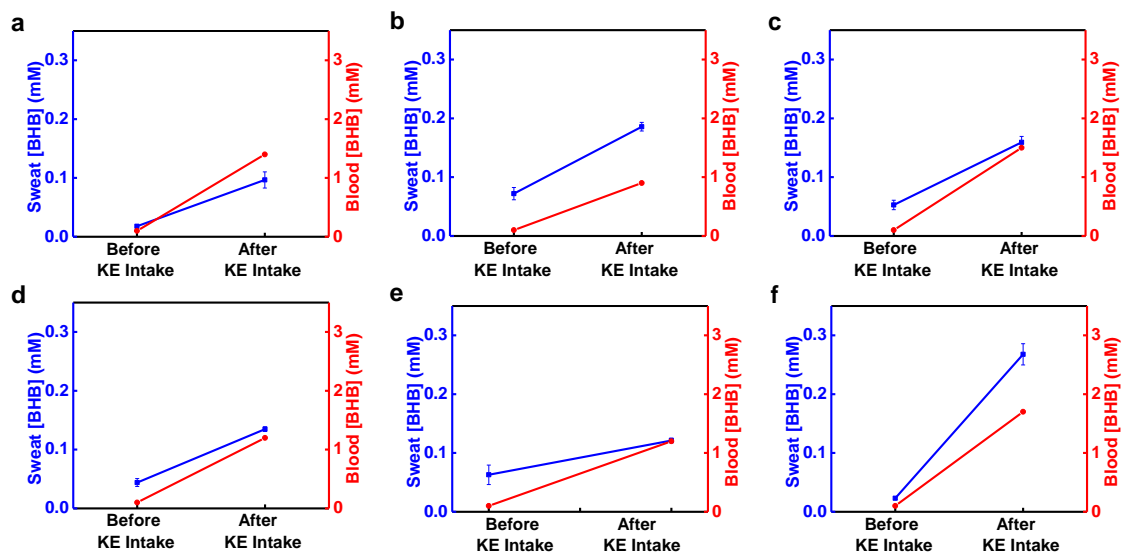

**Figure S6.** Measured sweat [BHB] and blood [BHB] before and after KE intake from subject 2 and subject 3 during a, d) exercise, b, e) sauna and c, f) shower.
